# Supplementary material for: Does Diversity of Authorship Matter? An Analysis of Plastic Surgery’s Top 100 Articles
Source: PubMed Central journal article supplement — Plast Reconstr Surg Glob Open. 2022 Mar 24;10(3):e4214. doi: 10.1097/GOX.0000000000004214 (PMC8947603; doi:10.1097/gox.0000000000004214), 2022-03-24
Supplement: gox-10-e4214-s001.pdf [file gox-10-e4214-s001.pdf]

---

**APPENDIX 1. Alphabetized List of Queried Journals**

---

Aesthetic Plastic Surgery

Aesthetic Surgery Journal

Annals of Plastic Surgery

Cleft Palate-Craniofacial Surgery

Clinics in Plastic Surgery

Facial Plastic Surgery

Facial Plastic Surgery Clinics of North America

Indian Journal of Surgery

JAMA Facial Plastic Surgery

Journal of Cranio-Maxillofacial Surgery

Journal of Craniofacial Surgery

Journal of Hand Surgery — American Volume

Journal of Plastic Reconstructive and Aesthetic Surgery

Journal of Plastic Surgery and Hand Surgery

Journal of Reconstructive Microsurgery

Ophthalmic Plastic and Reconstructive Surgery

Plastic and Reconstructive Surgery

Plastic and Reconstructive Surgery Global Open

Plastic Surgery

Seminars in Plastic Surgery
