# Supplementary material for: Does Diversity of Authorship Matter? An Analysis of Plastic Surgery’s Top 100 Articles
Source: PubMed Central journal article supplement — Plast Reconstr Surg Glob Open. 2022 Mar 24;10(3):e4214. doi: 10.1097/GOX.0000000000004214 (PMC8947603; doi:10.1097/gox.0000000000004214), 2022-03-24
Supplement: gox-10-e4214-s002.pdf [file gox-10-e4214-s002.pdf]

---

**APPENDIX 2.** List of Studied Articles

---

| <i>Title</i>                                                                                                                                                                      | <i>Journal<sup>†</sup></i> | <i>Year</i> | <i>Citations</i> |
|-----------------------------------------------------------------------------------------------------------------------------------------------------------------------------------|----------------------------|-------------|------------------|
| The Levels of Evidence and Their Role in Evidence-Based Medicine                                                                                                                  | PRS                        | 2011        | 512              |
| A Paradigm Shift in US Breast Reconstruction: Increasing Implant Rates                                                                                                            | PRS                        | 2013        | 481              |
| Implant-Based Breast Reconstruction Using Acellular Dermal Matrix and the Risk of Postoperative Complications                                                                     | PRS                        | 2010        | 319              |
| Hyperbaric Oxygen: Its Mechanisms and Efficacy                                                                                                                                    | PRS                        | 2011        | 286              |
| Observational Studies: Cohort and Case-Control Studies                                                                                                                            | PRS                        | 2010        | 270              |
| The Fate of Adipocytes after Nonvascularized Fat Grafting: Evidence of Early Death and Replacement of Adipocytes                                                                  | PRS                        | 2012        | 265              |
| Identifying and Avoiding Bias in Research                                                                                                                                         | PRS                        | 2010        | 247              |
| Adipose-derived stem cells enhance peripheral nerve regeneration                                                                                                                  | JPRAS                      | 2010        | 225              |
| Scarless Fetal Wound Healing: A Basic Science Review                                                                                                                              | PRS                        | 2010        | 225              |
| A Meta-Analysis of Human Acellular Dermis and Submuscular Tissue Expander Breast Reconstruction                                                                                   | PRS                        | 2012        | 221              |
| An 8-Year Experience of Direct-to-Implant Immediate Breast Reconstruction Using Human Acellular Dermal Matrix (AlloDerm)                                                          | PRS                        | 2011        | 221              |
| Patient Satisfaction in Postmastectomy Breast Reconstruction: A Comparative Evaluation of DIEP, TRAM, Latissimus Flap, and Implant Techniques                                     | PRS                        | 2010        | 216              |
| Characteristic Indocyanine Green Lymphography Findings in Lower Extremity Lymphedema: The Generation of a Novel Lymphedema Severity Staging System Using Dermal Backflow Patterns | PRS                        | 2011        | 212              |
| Nanofat Grafting: Basic Research and Clinical Applications                                                                                                                        | PRS                        | 2013        | 196              |
| The Most Current Algorithms for the Treatment and Prevention of Hypertrophic Scars and Keloids                                                                                    | PRS                        | 2010        | 195              |
| A Prospective Analysis of 100 Consecutive Lymphovenous Bypass Cases for Treatment of Extremity Lymphedema                                                                         | PRS                        | 2013        | 194              |
| Retrospective Review of 331 Consecutive Immediate Single-Stage Implant Reconstructions with Acellular Dermal Matrix: Indications, Complications, Trends, and Costs                | PRS                        | 2011        | 191              |
| Blindness following Cosmetic Injections of the Face                                                                                                                               | PRS                        | 2012        | 189              |
| A Paradigm Shift in U.S. Breast Reconstruction: Part 2. The Influence of Changing Mastectomy Patterns on Reconstructive Rate and Method                                           | PRS                        | 2013        | 186              |

|                                                                                                                                                                              |        |      |     |
|------------------------------------------------------------------------------------------------------------------------------------------------------------------------------|--------|------|-----|
| Acellular Human Dermis Implantation in 153 Immediate Two-Stage Tissue Expander Breast Reconstructions: Determining the Incidence and Significant Predictors of Complications | PRS    | 2010 | 182 |
| Intraoperative Perfusion Mapping with Laser-Assisted Indocyanine Green Imaging Can Predict and Prevent Complications in Immediate Breast Reconstruction                      | PRS    | 2010 | 182 |
| The Effect of Acellular Dermal Matrix Use on Complication Rates in Tissue Expander/Implant Breast Reconstruction                                                             | Annals | 2010 | 180 |
| Supplementation of Fat Grafts With Adipose-Derived Regenerative Cells Improves Long-Term Graft Retention                                                                     | Annals | 2010 | 179 |
| Anaplastic Large Cell Lymphoma Occurring in Women with Breast Implants: Analysis of 173 Cases                                                                                | PRS    | 2015 | 176 |
| A Systematic Review and Meta-Analysis of Complications Associated With Acellular Dermal Matrix-Assisted Breast Reconstruction                                                | Annals | 2012 | 175 |
| Breast Reconstruction following Nipple- Sparing Mastectomy: Predictors of Complications, Reconstruction Outcomes, and 5-Year Trends                                          | PRS    | 2014 | 175 |
| Comparison of Implant-Based Immediate Breast Reconstruction with and without Acellular Dermal Matrix                                                                         | PRS    | 2011 | 173 |
| Postoperative Complications in Prosthesis-Based Breast Reconstruction Using Acellular Dermal Matrix                                                                          | PRS    | 2011 | 170 |
| Brava and Autologous Fat Transfer Is a Safe and Effective Breast Augmentation Alternative: Results of a 6-Year, 81-Patient, Prospective Multicenter Study                    | PRS    | 2012 | 169 |
| Bacterial Biofilm Infection Detected in Breast Implant-Associated Anaplastic Large-Cell Lymphoma                                                                             | PRS    | 2016 | 167 |
| Fat Grafting: Evidence-Based Review on Autologous Fat Harvesting, Processing, Reinjection, and Storage                                                                       | PRS    | 2012 | 164 |
| Indocyanine Green-Enhanced Lymphography for Upper Extremity Lymphedema: A Novel Severity Staging System Using Dermal Backflow Patterns                                       | PRS    | 2011 | 163 |
| Intraoperative Perfusion Techniques Can Accurately Predict Mastectomy Skin Flap Necrosis in Breast Reconstruction: Results of a Prospective Trial                            | PRS    | 2012 | 161 |
| Acellular Dermis-Assisted Prosthetic Breast Reconstruction: A Systematic and Critical Review of Efficacy and Associated Morbidity                                            | PRS    | 2011 | 160 |
| Degeneration, Regeneration, and Cicatrization after Fat Grafting: Dynamic Total Tissue Remodeling during the First 3 Months                                                  | PRS    | 2014 | 160 |

|                                                                                                                                                                                                                             |                        |      |     |
|-----------------------------------------------------------------------------------------------------------------------------------------------------------------------------------------------------------------------------|------------------------|------|-----|
| The BREAST-Q: Further Validation in Independent Clinical Samples                                                                                                                                                            | PRS                    | 2012 | 157 |
| The Earliest Finding of Indocyanine Green Lymphography in Asymptomatic Limbs of Lower Extremity Lymphedema Patients Secondary to Cancer Treatment: The Modified Dermal Backflow Stage and Concept of Subclinical Lymphedema | PRS                    | 2011 | 157 |
| Tissue engineering with adipose-derived stem cells (ADSCs): Current and future applications                                                                                                                                 | JPRAS                  | 2010 | 154 |
| Vascularized Groin Lymph Node Flap Transfer for Postmastectomy Upper Limb Lymphedema: Flap Anatomy, Recipient Sites, and Outcomes                                                                                           | PRS                    | 2013 | 153 |
| Advancements in Free Flap Monitoring in the Last Decade: A Critical Review                                                                                                                                                  | PRS                    | 2010 | 149 |
| Breast Implant-Associated Anaplastic Large Cell Lymphoma in Australia and New Zealand: High-Surface-Area Textured Implants Are Associated with Increased Risk                                                               | PRS                    | 2017 | 149 |
| Prepectoral Implant-Based Breast Reconstruction: Rationale, Indications, and Preliminary Results                                                                                                                            | PRS                    | 2017 | 148 |
| A Meta-Analysis Comparing Breast Conservation Therapy Alone to the Oncoplastic Technique                                                                                                                                    | Annals                 | 2014 | 147 |
| Subclinical (Biofilm) Infection Causes Capsular Contracture in a Porcine Model following Augmentation Mammoplasty                                                                                                           | PRS                    | 2010 | 147 |
| Oncoplastic Breast Surgery for Cancer: Analysis of 540 Consecutive Cases                                                                                                                                                    | PRS                    | 2010 | 146 |
| Measuring Patient-Reported Outcomes in Facial Aesthetic Patients: Development of the FACE-Q                                                                                                                                 | Facial Plastic Surgery | 2010 | 140 |
| Influence of decantation, washing and centrifugation on adipocyte and mesenchymal stem cell content of aspirated adipose tissue: A comparative study                                                                        | JPRAS                  | 2010 | 136 |
| Outcome of Different Timings of Radiotherapy in Implant-Based Breast Reconstructions                                                                                                                                        | PRS                    | 2011 | 136 |
| The Current State of Fat Grafting: A Review of Harvesting, Processing, and Injection Techniques                                                                                                                             | PRS                    | 2015 | 136 |
| Adipose Tissue Remodeling under Ischemia: Death of Adipocytes and Activation of Stem/Progenitor Cells                                                                                                                       | PRS                    | 2010 | 135 |
| Five-Year Results of a Randomized Clinical Trial on Treatment in Dupuytren's Disease: Percutaneous Needle Fasciotomy versus Limited Fasciectomy                                                                             | PRS                    | 2012 | 135 |

|                                                                                                                                                                                    |       |      |     |
|------------------------------------------------------------------------------------------------------------------------------------------------------------------------------------|-------|------|-----|
| Quality-of-Life Outcomes between Mastectomy Alone and Breast Reconstruction: Comparison of Patient-Reported BREAST-Q and Other Health-Related Quality-of-Life Measures             | PRS   | 2013 | 135 |
| The Oncologic Outcome and Immediate Surgical Complications of Lipofilling in Breast Cancer Patients: A Multicenter Study-Milan-Paris-Lyon Experience of 646 Lipofilling Procedures | PRS   | 2011 | 135 |
| Current Status of Grafts and Implants in Rhinoplasty: Part II. Homologous Grafts and Allogenic Implants                                                                            | PRS   | 2010 | 134 |
| The Tokyo Consensus on Propeller Flaps                                                                                                                                             | PRS   | 2011 | 132 |
| Lymphaticovenular Bypass for Lymphedema Management in Breast Cancer Patients: A Prospective Study                                                                                  | PRS   | 2010 | 130 |
| US Epidemiology of Breast Implant-Associated Anaplastic Large Cell Lymphoma                                                                                                        | PRS   | 2017 | 130 |
| A Prospective Study of Donor-Site Morbidity after Anterolateral Thigh Fasciocutaneous and Myocutaneous Free Flap Harvest in 220 Patients                                           | PRS   | 2010 | 129 |
| Testing the Critical Size in Calvarial Bone Defects: Revisiting the Concept of a Critical-Size Defect                                                                              | PRS   | 2010 | 127 |
| Aging Changes of the Midfacial Fat Compartments: A Computed Tomographic Study                                                                                                      | PRS   | 2012 | 126 |
| Natrelle Round Silicone Breast Implants: Core Study Results at 10 Years                                                                                                            | PRS   | 2014 | 126 |
| Human Adipose Stem Cells: Current Clinical Applications                                                                                                                            | PRS   | 2012 | 125 |
| Use of Virtual Surgery and Stereolithography-Guided Osteotomy for Mandibular Reconstruction with the Free Fibula                                                                   | PRS   | 2011 | 125 |
| Chronic Biofilm Infection in Breast Implants Is Associated with an Increased T-Cell Lymphocytic Infiltrate: Implications for Breast Implant-Associated Lymphoma                    | PRS   | 2015 | 123 |
| Extracranial Arteriovenous Malformations: Natural Progression and Recurrence after Treatment                                                                                       | PRS   | 2010 | 123 |
| Prepectoral Breast Reconstruction: A Safe Alternative to Submuscular Prosthetic Reconstruction following Nipple-Sparing Mastectomy                                                 | PRS   | 2017 | 123 |
| Risk Factor Analysis for Capsular Contracture: A 5-Year Sientra Study Analysis Using Round, Smooth, and Textured implants for Breast Augmentation                                  | PRS   | 2013 | 123 |
| Craniofacial reconstruction with bone and biomaterials: Review over the last 11 years                                                                                              | JPRAS | 2010 | 122 |

|                                                                                                                                                                     |       |      |     |
|---------------------------------------------------------------------------------------------------------------------------------------------------------------------|-------|------|-----|
| First US Near-Total Human Face Transplantation: A Paradigm Shift for Massive Complex Injuries                                                                       | PRS   | 2010 | 122 |
| The BREAST-Q in surgical research: A review of the literature 2009-2015                                                                                             | JPRAS | 2016 | 122 |
| Acellular Cadaveric Dermis Decreases the Inflammatory Response in Capsule Formation in Reconstructive Breast Surgery                                                | PRS   | 2010 | 120 |
| Breast Reconstruction with the Profunda Artery Perforator Flap                                                                                                      | PRS   | 2012 | 120 |
| Hand and Upper Extremity Transplantation: An Update of Outcomes in the Worldwide Experience                                                                         | PRS   | 2015 | 120 |
| A Systematic Review of the Outcomes of Replantation of Distal Digital Amputation                                                                                    | PRS   | 2011 | 119 |
| Nipple-Sparing Mastectomy for Prophylactic and Therapeutic Indications                                                                                              | PRS   | 2011 | 119 |
| Blindness Caused by Cosmetic Filler Injection: A Review of Cause and Therapy                                                                                        | PRS   | 2014 | 118 |
| Determining the Oncological Risk of Autologous Lipoaspirate Grafting for Post-Mastectomy Breast Reconstruction                                                      | APS   | 2010 | 114 |
| Postoperative Enoxaparin Prevents Symptomatic Venous Thromboembolism in High-Risk Plastic Surgery Patients                                                          | PRS   | 2011 | 114 |
| Breast Reconstruction following Nipple-Sparing Mastectomy: A Systematic Review of the Literature with Pooled Analysis                                               | PRS   | 2013 | 113 |
| Anaplastic Large Cell Lymphoma and Breast Implants: A Systematic Review                                                                                             | PRS   | 2011 | 110 |
| Breast Augmentation Using Preexpansion and Autologous Fat Transplantation: A Clinical Radiographic Study                                                            | PRS   | 2011 | 110 |
| Fat Grafting in Postmastectomy Breast Reconstruction with Expanders and Prostheses in Patients Who Have Received Radiotherapy: Formation of New Subcutaneous Tissue | PRS   | 2010 | 110 |
| The Anatomical (Angiosome) and Clinical Territories of Cutaneous Perforating Arteries: Development of the Concept and Designing Safe Flaps                          | PRS   | 2011 | 110 |
| The Level of Evidence Pyramid: Indicating Levels of Evidence in Plastic and Reconstructive Surgery Articles                                                         | PRS   | 2011 | 110 |
| Breast Implant Complication Review: Double Capsules and Late Seromas                                                                                                | PRS   | 2011 | 109 |
| Changes in the Facial Skeleton With Aging: Implications and Clinical Applications in Facial Rejuvenation                                                            | APS   | 2012 | 108 |
| Five-Year Outcome of Surgical Treatment of Migraine Headaches                                                                                                       | PRS   | 2011 | 108 |

|                                                                                                                                                                                       |                                      |      |     |
|---------------------------------------------------------------------------------------------------------------------------------------------------------------------------------------|--------------------------------------|------|-----|
| The Role of Bacterial Biofilms in Device-Associated Infection                                                                                                                         | PRS                                  | 2013 | 108 |
| The Volumetric Analysis of Fat Graft Survival in Breast Reconstruction                                                                                                                | PRS                                  | 2013 | 107 |
| Adipose-Derived Stem Cells for Wound Healing Applications                                                                                                                             | Annals                               | 2011 | 106 |
| Current Trends in Breast Reconstruction Survey of American Society of Plastic Surgeons 2010                                                                                           | Annals                               | 2013 | 106 |
| Patient Satisfaction following Nipple-Sparing Mastectomy and Immediate Breast Reconstruction: An 8-Year Outcome Study                                                                 | PRS                                  | 2010 | 105 |
| Wound Edge Microvascular Blood Flow during Negative-Pressure Wound Therapy: Examining the Effects of Pressures from -10 to -175 mmHg                                                  | PRS                                  | 2010 | 105 |
| A Systematic Review of Patient-Reported Nasal Obstruction Scores Defining Normative and Symptomatic Ranges in Surgical Patients                                                       | JAMA<br>Facial<br>Plastic<br>Surgery | 2014 | 104 |
| Perforasomes of the DIEP Flap: Vascular Anatomy of the Lateral versus Medial Row Perforators and Clinical Implications                                                                | PRS                                  | 2010 | 104 |
| Prepectoral implant placement and complete coverage with porcine acellular dermal matrix: A new technique for direct-to-implant breast reconstruction after nipple-sparing mastectomy | JPRAS                                | 2015 | 104 |
| Operative Treatment of Peripheral Lymphedema: A Systematic Meta-Analysis of the Efficacy and Safety of Lymphovenous Microsurgery and Tissue Transplantation                           | PRS                                  | 2014 | 103 |
| Predicting Mastectomy Skin Flap Necrosis with Indocyanine Green Angiography: The Gray Area Defined                                                                                    | PRS                                  | 2012 | 103 |
| Vascular complications of hyaluronic acid fillers and the role of hyaluronidase in management                                                                                         | JPRAS                                | 2011 | 103 |
| Aging of the Facial Skeleton: Aesthetic Implications and Rejuvenation Strategies                                                                                                      | PRS                                  | 2011 | 102 |
| Enhanced recovery after surgery in microvascular breast reconstruction                                                                                                                | JPRAS                                | 2015 | 102 |
| The Propeller Flap Concept                                                                                                                                                            | Clinics in<br>Plastic<br>Surgery     | 2010 | 102 |
| Updated Scar Management Practical Guidelines: Non-invasive and invasive measures                                                                                                      | JPRAS                                | 2014 | 102 |

---

†Annals: Annals of Plastic Surgery; APS: Aesthetic Plastic Surgery; JPRAS: Journal of Plastic, Reconstructive & Aesthetic Surgery; PRS: Plastic and Reconstructive Surgery
